# Supplementary material for: Photoluminescence, persistent luminescence and thermoluminescence studies of Cr-doped zinc gallogermanate (ZGGO:Cr)
Source: Royal Society of Chemistry journal article supplement (doi:10.1039/d4tc03924f), 2024-01-01
Supplement: d4tc03924f2.pdf [file d4tc03924f2.pdf]

## Supplementary Information

# Photoluminescence, persistent luminescence and thermoluminescence studies of Cr-doped zinc gallogermanate (ZGGO:Cr)

Duarte M. Esteves<sup>1,2,\*</sup>, Maria S. Batista<sup>3</sup>, Joana Rodrigues<sup>3</sup>, Ana V. Girão<sup>4</sup>, Luís C. Alves<sup>5,6</sup>, Ana L. Rodrigues<sup>5,6</sup>,  
M. Isabel Dias<sup>5,6</sup>, Florinda M. Costa<sup>3</sup>, Katharina Lorenz<sup>1,2,6</sup>, Sónia O. Pereira<sup>3</sup>, Teresa Monteiro<sup>3</sup>, Marco Peres<sup>1,2,6</sup>

<sup>1</sup> INESC MN, Rua Alves Redol 9, Lisboa 1000-029, Portugal

<sup>2</sup> IPFN, Instituto Superior Técnico, University of Lisbon, Av. Rovisco Pais 1, Lisboa 1049-001, Portugal

<sup>3</sup> i3N, Department of Physics, University of Aveiro, 3810-193 Aveiro, Portugal

<sup>4</sup> CICECO-Aveiro Institute of Materials, Department of Materials and Ceramic Engineering, University of Aveiro, 3810-193 Aveiro, Portugal

<sup>5</sup> C<sup>2</sup>TN, Instituto Superior Técnico, University of Lisbon, Estrada Nacional 10, km 139.7, Bobadela 2695-066, Portugal

<sup>6</sup> Department of Nuclear Sciences and Engineering, Instituto Superior Técnico, University of Lisbon, Estrada Nacional 10, km 139.7, Bobadela 2695-066, Portugal

### S1. Thermoluminescence model: fitting parameters

This section of the supplementary information file presents the fitting parameters used in Figure 6 of the main manuscript, according to the thermoluminescence (TL) model based on a continuous density of states (DOS) within the bandgap which can be approximated by the sum of three Gaussian functions, as given by Equation (S1). The goodness-of-fit was assessed by the usual TL figure of merit (FOM), as given by Equation (S2) The resulting fitting parameters are summarised in Tables S1 and S2, respectively.

$$I(T) = c_1 + c_2 \exp(c_3 T) + \int_{E_{min}}^{E_{max}} \frac{s}{\beta} \exp\left(-\frac{E}{kT}\right) \exp\left[-\frac{skT^2}{\beta E} \exp\left(-\frac{E}{kT}\right) \left(1 - \frac{2kT}{E}\right)\right] \sum_{i=1}^3 n_{0i} \exp\left[-\frac{1}{2} \left(\frac{E - \mu_i}{\sigma_i}\right)^2\right] dE. \quad (S1)$$

$$FOM = \frac{\sum_T |I_{exp}(T) - I_{fit}(T)|}{\sum_T I_{exp}(T)} \times 100\% , \quad (S2)$$

**Table S1.** Fitting parameters of the fits shown in Figure 6a) of the main manuscript, according to Equations (3–5), and respective FOM, as computed from Equation (6).

| $t$                            | 0 min                 | 5 min | 10 min | 20 min | 40 min | 1 h   | 2 h   | 4 h   | 8 h   | 16 h  | 19 h  | 48 h  | 96 h  |
|--------------------------------|-----------------------|-------|--------|--------|--------|-------|-------|-------|-------|-------|-------|-------|-------|
| $\mu_1$ (eV)                   | 0.823                 | 0.826 | 0.823  | 0.834  | 0.839  | 0.843 | 0.852 | 0.862 | 0.873 | 0.883 | 0.891 | 0.916 | 0.926 |
| $\mu_2$ (eV)                   | 0.919                 | 0.919 | 0.919  | 0.923  | 0.926  | 0.929 | 0.935 | 0.944 | 0.953 | 0.960 | 0.967 | 0.988 | 0.996 |
| $\mu_3$ (eV)                   | 1.01                  | 1.01  | 1.01   | 1.02   | 1.03   | 1.02  | 1.03  | 1.04  | 1.05  | 1.05  | 1.06  | 1.08  | 1.09  |
| $\sigma_1$ ( $\times 10^2$ eV) | 4.05                  | 3.69  | 4.01   | 3.35   | 3.09   | 2.98  | 2.79  | 2.61  | 2.50  | 2.27  | 2.25  | 2.19  | 2.07  |
| $\sigma_2$ ( $\times 10^2$ eV) | 6.75                  | 6.36  | 6.73   | 5.96   | 5.70   | 5.59  | 5.37  | 5.20  | 5.03  | 4.77  | 4.73  | 4.46  | 4.32  |
| $\sigma_3$ ( $\times 10^2$ eV) | 9.18                  | 8.85  | 9.17   | 8.49   | 8.29   | 8.18  | 7.99  | 7.81  | 7.65  | 7.39  | 7.37  | 7.09  | 6.95  |
| $n_{01}$ ( $\times 10^7$ )     | 11.2                  | 11.6  | 11.1   | 11.9   | 11.9   | 11.7  | 11.3  | 10.7  | 9.88  | 9.36  | 9.23  | 8.00  | 6.67  |
| $n_{02}$ ( $\times 10^7$ )     | 15.5                  | 15.5  | 15.6   | 15.5   | 15.7   | 15.6  | 15.5  | 15.3  | 14.8  | 14.5  | 14.6  | 12.9  | 11.5  |
| $n_{03}$ ( $\times 10^7$ )     | 6.81                  | 7.42  | 6.82   | 7.70   | 7.63   | 7.50  | 7.25  | 6.66  | 6.02  | 5.69  | 5.43  | 4.30  | 3.93  |
| $s$ (GHz)                      | 6.00                  |       |        |        |        |       |       |       |       |       |       |       |       |
| $c_1$                          | $8.02 \times 10^{-3}$ |       |        |        |        |       |       |       |       |       |       |       |       |
| $c_2$                          | 2.85                  |       |        |        |        |       |       |       |       |       |       |       |       |

|                          |                       |      |      |      |      |      |      |      |      |      |      |      |      |
|--------------------------|-----------------------|------|------|------|------|------|------|------|------|------|------|------|------|
| $c_3$ (K <sup>-1</sup> ) | $1.09 \times 10^{-2}$ |      |      |      |      |      |      |      |      |      |      |      |      |
| FOM (%)                  | 1.60                  | 1.85 | 1.58 | 2.08 | 2.08 | 2.16 | 2.26 | 2.27 | 2.24 | 2.34 | 2.29 | 2.40 | 2.46 |

**Table S2.** Fitting parameters of the fits shown in Figure 6d) of the main manuscript, according to Equations (3–5), and respective FOM, as computed from Equation (6).

| $t$ (s)                        | 50                    | 100       | 200       | 300       | 500       | 700       | 900       | 1100  | 1400  | 1700  | 2000  | 2400  | 2800  | 3000  | 3400  | 3800  | 4000  |
|--------------------------------|-----------------------|-----------|-----------|-----------|-----------|-----------|-----------|-------|-------|-------|-------|-------|-------|-------|-------|-------|-------|
| $\mu_1$ (eV)                   | 0.83<br>3             | 0.83<br>4 | 0.84<br>6 | 0.83<br>9 | 0.83<br>6 | 0.83<br>5 | 0.83<br>3 | 0.832 | 0.834 | 0.834 | 0.831 | 0.830 | 0.831 | 0.830 | 0.830 | 0.827 | 0.829 |
| $\mu_2$ (eV)                   | 1.02<br>2             | 1.01<br>3 | 0.99<br>9 | 0.98<br>8 | 0.97<br>7 | 0.96<br>9 | 0.96<br>1 | 0.955 | 0.950 | 0.946 | 0.936 | 0.930 | 0.927 | 0.924 | 0.922 | 0.915 | 0.918 |
| $\mu_3$ (eV)                   | —                     | —         | —         | —         | —         | —         | —         | 1.15  | 1.11  | 1.09  | 1.05  | 1.03  | 1.03  | 1.02  | 1.02  | 1.01  | 1.01  |
| $\sigma_1$ ( $\times 10^2$ eV) | 5.55                  | 5.82      | 6.06      | 5.66      | 5.35      | 5.16      | 4.86      | 4.70  | 4.67  | 4.57  | 4.34  | 4.23  | 4.16  | 4.09  | 3.98  | 3.84  | 3.91  |
| $\sigma_2$ ( $\times 10^2$ eV) | 9.81                  | 9.98      | 7.34      | 7.87      | 8.20      | 8.37      | 8.41      | 8.31  | 8.16  | 7.85  | 7.51  | 7.23  | 7.03  | 6.92  | 6.76  | 6.51  | 6.58  |
| $\sigma_3$ ( $\times 10^2$ eV) | —                     | —         | —         | —         | —         | —         | —         | 12.9  | 12.1  | 11.3  | 10.3  | 9.91  | 9.65  | 9.55  | 9.42  | 9.20  | 9.26  |
| $n_{01}$ ( $\times 10^7$ )     | 0.18<br>0             | 0.37<br>1 | 1.14      | 1.64      | 2.68      | 3.64      | 4.50      | 5.40  | 6.94  | 8.80  | 9.89  | 11.7  | 13.5  | 14.4  | 15.9  | 16.7  | 18.0  |
| $n_{02}$ ( $\times 10^7$ )     | 0.43<br>6             | 0.91<br>2 | 1.79      | 2.81      | 4.78      | 6.68      | 8.57      | 10.2  | 12.3  | 14.2  | 15.6  | 17.4  | 19.0  | 19.9  | 21.5  | 22.7  | 23.7  |
| $n_{03}$ ( $\times 10^7$ )     | —                     | —         | —         | —         | —         | —         | —         | 1.37  | 1.70  | 2.24  | 3.75  | 5.06  | 6.20  | 6.85  | 7.81  | 9.75  | 9.01  |
| $s$ (GHz)                      | 6.00                  |           |           |           |           |           |           |       |       |       |       |       |       |       |       |       |       |
| $c_1$                          | $8.02 \times 10^{-3}$ |           |           |           |           |           |           |       |       |       |       |       |       |       |       |       |       |

|                          |                         |      |      |      |      |      |      |      |      |      |      |      |      |      |      |      |      |
|--------------------------|-------------------------|------|------|------|------|------|------|------|------|------|------|------|------|------|------|------|------|
| $c_2$                    |                         |      |      |      |      |      |      |      | 2.85 |      |      |      |      |      |      |      |      |
| $c_3$ (K <sup>-1</sup> ) | 1.09 × 10 <sup>-2</sup> |      |      |      |      |      |      |      |      |      |      |      |      |      |      |      |      |
| FOM (%)                  | 4.93                    | 3.35 | 2.88 | 2.41 | 1.92 | 1.87 | 1.76 | 1.78 | 1.74 | 1.78 | 1.74 | 1.73 | 1.77 | 1.78 | 1.85 | 1.83 | 1.82 |
